# Supplementary material for: The Relationship between Resistance Training Frequency and Muscle Quality in Adolescents
Source: MDPI journal article supplement (doi:10.3390/ijerph19138099), 2022-07-01
Supplement: s1 [file s1]

**Supplementary Table S1.** Association between resistance training (RT: 1 day/week, 2 day/week, 3 day/week, 4 day/week, and 5–7 day/week) and muscle quality among those aged 12–15.

|         | P-value of association between RT and MQ   |                                                 |                                             |                                                    |                                            |                                        |                                               |                                             |                                                    |                                                 |
|---------|--------------------------------------------|-------------------------------------------------|---------------------------------------------|----------------------------------------------------|--------------------------------------------|----------------------------------------|-----------------------------------------------|---------------------------------------------|----------------------------------------------------|-------------------------------------------------|
|         | Very Low (1 day/week) vs. Low (2 day/week) | Very Low (1 day/week) vs. Moderate (3 day/week) | Very Low (1 day/week) vs. High (4 day/week) | Very Low (1 day/week) vs. Very High (5-7 day/week) | Low (2 day/week) vs. Moderate (3 day/week) | Low (2 day/week) vs. High (4 day/week) | Low (2 day/week) vs. Very High (5-7 day/week) | Moderate (3 day/week) vs. High (4 day/week) | Moderate (3 day/week) vs. Very High (5-7 day/week) | High (4 days/week) vs. Very High (5-7 day/week) |
|         | P-value                                    | P-value                                         | P-value                                     | P-value                                            | P-value                                    | P-value                                | P-value                                       | P-value                                     | P-value                                            | P-value                                         |
| Model 1 | 0.6177                                     | 0.7561                                          | 0.8806                                      | 0.9606                                             | 0.7264                                     | 0.6183                                 | 0.3642                                        | 0.8407                                      | 0.6507                                             | 0.8469                                          |
| Model 2 | 0.6431                                     | 0.7628                                          | 0.1935                                      | 0.4514                                             | 0.7686                                     | 0.3945                                 | 0.7921                                        | 0.2769                                      | 0.5321                                             | 0.5538                                          |
| Model 3 | 0.7192                                     | 0.9149                                          | 0.2819                                      | 0.5323                                             | 0.6787                                     | 0.4432                                 | 0.7285                                        | 0.3017                                      | 0.4752                                             | 0.6234                                          |
